# Supplementary material for: Synthesis and magnetic properties of cerium macrocyclic complexes with tetramethyldibenzotetraaza[14]annulene, tmtaaH2
Source: Royal Society of Chemistry journal article supplement (doi:10.1039/b602644c), 2006-01-01
Supplement: b602644c.pdf [file b602644c.pdf]

Supporting information for

**Synthesis and Magnetic Properties of Cerium Macrocyclic Complexes  
with tmtaaH<sub>2</sub>, Tetramethyldibenzotetraaza[14]-annulene**

**Marc D. Walter,<sup>a</sup> Rosa Fandos<sup>a,b</sup> and Richard A. Andersen<sup>\*a</sup>**

<sup>a</sup> Department of Chemistry and Chemical Sciences Division of Lawrence Berkeley National  
Laboratory, University of California, Berkeley, California, CA 94720, USA

<sup>b</sup> Departamento de Química Inorgánica, Orgánica y Bioquímica, Universidad de Castilla-La  
Mancha, Facultad de Ciencias del Medio Ambiente.

Avd. Carlos III, s/n, 45071 Toledo, Spain

E-mail: raandersen@lbl.gov

**Contents:**

|                                                                             |    |
|-----------------------------------------------------------------------------|----|
| 1. Ce(tmtaa) <sub>2</sub> *(C <sub>5</sub> H <sub>12</sub> ) <sub>0.5</sub> | 2  |
| 2. Ce(tmtaa)(tmtaaH)                                                        | 21 |
| 3. References                                                               | 27 |

# 1. $\text{Ce}(\text{tmtaa})_2^*(\text{C}_5\text{H}_{12})_{0.5}$

## 1.1 Labeling Diagram

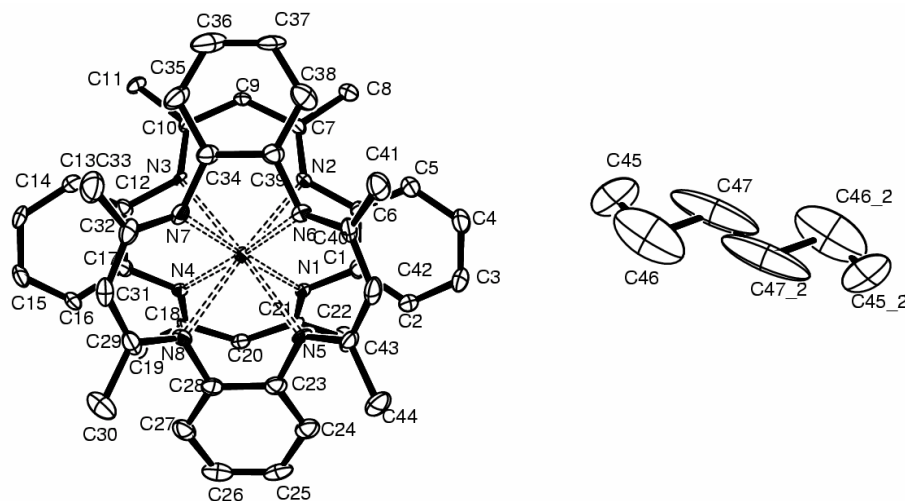

**Figure S1.** ORTEP diagram of  $\text{Ce}(\text{tmtaa})_2^*(\text{C}_5\text{H}_{12})_{0.5}$  (50% probability ellipsoids). The atom labels bearing  $_2$  are symmetry related positions. C45 in the disordered pentane molecule has 0.5 occupancy.

## 1.2 Experimental Details

### Data Collection

A fragment of a block green-like crystal of  $\text{C}_{46.50}\text{H}_{44}\text{CeN}_8$  having approximate dimensions of 0.32 x 0.24 x 0.16 mm was mounted on a glass fiber using Paratone N hydrocarbon oil. All measurements were made on a Bruker SMART CCD<sup>10</sup> CCD area detector with graphite monochromated  $\text{MoK}\alpha$  radiation.

Cell constants and an orientation matrix, obtained from a least-squares refinement using the measured positions of 6639 centered reflections with  $I > 10\sigma(I)$  in the range  $2.2 < \theta < 24.7^\circ$  corresponded to a primitive Triclinic cell with dimensions:

$$\begin{aligned} a &= 11.417(1) \text{ \AA} & \alpha &= 107.720(2)^\circ \\ b &= 11.543(1) \text{ \AA} & \beta &= 90.261(2)^\circ \\ c &= 16.419(2) \text{ \AA} & \gamma &= 107.884(2)^\circ \\ V &= 1950.1(4) \text{ \AA}^3 \end{aligned}$$

For  $Z = 2$  and F.W. = 855.02, the calculated density is  $1.456 \text{ g/cm}^3$ .

Analysis of the systematic absences allowed the space group to be uniquely determined to be:

P-1

The data were collected at a temperature of 136(2) K. Frames corresponding to an arbitrary hemisphere of data were collected using  $\omega$  scans of  $0.3^\circ$  counted for a total of 10 seconds per frame.

## Data Reduction

Data were integrated by the program SAINT<sup>11</sup> to a maximum  $\theta$  value of 24.72°. The data were corrected for Lorentz and polarization effects. Data were analyzed for agreement and possible absorption using XPREP<sup>12</sup>. An empirical absorption correction based on comparison of redundant and equivalent reflections was applied using SADABS<sup>13</sup>. (Tmax = 0.8297, Tmin = 0.6977). Of the 9863 reflections that were collected, 6189 were unique ( $R_{\text{int}} = 0.0425$ ); equivalent reflections were merged. No decay correction was applied.

## Structure Solution and Refinement

The structure was solved by direct methods<sup>1</sup> and expanded using Fourier techniques<sup>2</sup>. Non-hydrogen atoms were refined anisotropically. Hydrogen atoms were included in calculated positions using a riding model, but not refined. However, no H atoms corresponding to the disordered pentane were included in the refinement. The final cycle of full-matrix least-squares refinement<sup>3</sup> was based on 6189 reflections (all data) and 514 variable parameters and converged (largest parameter shift was 0.000 times its esd) with conventional unweighted and weighted agreement factors of:

$$R_1 = \sum ||F_o| - |F_c|| / \sum |F_o| = 0.0468 \text{ for } 5527 \text{ data with } I > 2\sigma(I)$$

$$wR_2 = [(\sum w (|F_o|^2 - |F_c|^2)^2 / \sum w |F_o|^2)]^{1/2} = 0.1238$$

The standard deviation of an observation of unit weight<sup>4</sup> was 1.046. The weighting scheme was based on counting statistics and included a factor ( $q = 0.082$ ) to downweight the intense reflections. The maximum and minimum peaks on the final difference Fourier map corresponded to 2.009 and -2.059  $e^{-}/\text{\AA}^3$ , respectively.

Neutral atom scattering factors were taken from Cromer and Waber<sup>5</sup>. Anomalous dispersion effects were included in  $F_{\text{calc}}$ <sup>6</sup>; the values for  $\Delta f'$  and  $\Delta f''$  were those of Creagh and McAuley<sup>7</sup>. The values for the mass attenuation coefficients are those of Creagh and Hubbel<sup>8</sup>. All calculations were performed using the SHELXTL<sup>9</sup> crystallographic software package of Bruker Analytical X-ray Systems Inc.

## EXPERIMENTAL DETAILS

### A. Crystal Data

|                      |                                                                                                                                                                                                                       |
|----------------------|-----------------------------------------------------------------------------------------------------------------------------------------------------------------------------------------------------------------------|
| Empirical Formula    | $C_{46.50}H_{44}CeN_8$                                                                                                                                                                                                |
| Formula Weight       | 855.02                                                                                                                                                                                                                |
| Crystal Color, Habit | block, green                                                                                                                                                                                                          |
| Crystal Dimensions   | 0.32 x 0.24 x 0.16 mm                                                                                                                                                                                                 |
| Crystal System       | Triclinic                                                                                                                                                                                                             |
| Lattice Type         | primitive                                                                                                                                                                                                             |
| Lattice Parameters   | $a = 11.417(1) \text{ \AA}$<br>$b = 11.543(1) \text{ \AA}$<br>$c = 16.419(2) \text{ \AA}$<br>$\alpha = 107.720(2)^\circ$<br>$\beta = 90.261(2)^\circ$<br>$\gamma = 107.884(2)^\circ$<br>$V = 1950.1(4) \text{ \AA}^3$ |
| Space Group          | P-1                                                                                                                                                                                                                   |
| Z value              | 2                                                                                                                                                                                                                     |
| $D_{\text{calc}}$    | $1.456 \text{ g/cm}^3$                                                                                                                                                                                                |
| $F_{000}$            | 874                                                                                                                                                                                                                   |
| $\mu$ (MoK)          | $1.21 \text{ cm}^{-1}$                                                                                                                                                                                                |

### B. Intensity Measurements

|                             |                                                                                                 |
|-----------------------------|-------------------------------------------------------------------------------------------------|
| Diffractometer              | Bruker SMART CCD                                                                                |
| Radiation                   | MoK( $\lambda = 0.71073 \text{ \AA}$ )<br>graphite monochromated                                |
| Detector Position           | 60.00 mm                                                                                        |
| Exposure Time               | 10 seconds per frame.                                                                           |
| Scan Type                   | $\omega$ (0.3 degrees per frame)                                                                |
| $\theta_{\text{max}}$       | $24.72^\circ$                                                                                   |
| No. of Reflections Measured | Total: 9863<br>Unique: 6189 ( $R_{\text{int}} = 0.0425$ )                                       |
| Corrections                 | Lorentz-polarization<br>Absorption ( $T_{\text{max}} = 0.8297$ ,<br>$T_{\text{min}} = 0.6977$ ) |

### C. Structure Solution and Refinement

|                                          |                                                                               |
|------------------------------------------|-------------------------------------------------------------------------------|
| Structure Solution                       | direct (SHELXS-97 (Sheldrick, 1997))                                          |
| Refinement                               | Full-matrix least-squares                                                     |
| Function Minimized                       | $\sum w( F_o ^2 -  F_c ^2)^2$                                                 |
| Least Squares Weighting scheme           | $w = 1/[\sigma^2(F_o^2) + (qP)^2 + 1.347P]$<br>where $P = [F_o^2 + 2F_c^2]/3$ |
| q-factor                                 | 0.082                                                                         |
| Anomalous Dispersion                     | All non-hydrogen atoms                                                        |
| No. Observations ( $I > 2.00\sigma(I)$ ) | 5527                                                                          |
| No. Variables                            | 514                                                                           |
| Reflection/Parameter Ratio               | 10.75                                                                         |
| Residuals: R; $wR_2$ ; Rall              | 0.0468; 0.1238; 0.0524                                                        |
| Goodness of Fit Indicator                | 1.046                                                                         |
| Max Shift/Error in Final Cycle           | 0.000                                                                         |
| Maximum peak in Final Diff. Map          | $2.009 \text{ e}^-/\text{\AA}^3$                                              |
| Minimum peak in Final Diff. Map          | $-2.059 \text{ e}^-/\text{\AA}^3$                                             |

### 1.3 Tables

Table 1. Atomic coordinates and  $U_{\text{iso}}/U_{\text{eq}}$  and occupancy

| atom | x          | y          | z          | $U_{\text{eq}}$ | Occupancy |
|------|------------|------------|------------|-----------------|-----------|
| C1   | 0.4781(4)  | 0.1794(4)  | 0.1603(3)  | 0.018(1)        | 1         |
| C2   | 0.4776(4)  | 0.0746(4)  | 0.1864(3)  | 0.023(1)        | 1         |
| C3   | 0.5835(5)  | 0.0724(5)  | 0.2263(3)  | 0.029(1)        | 1         |
| C4   | 0.6917(5)  | 0.1783(5)  | 0.2439(3)  | 0.029(1)        | 1         |
| C5   | 0.6932(4)  | 0.2828(5)  | 0.2198(3)  | 0.023(1)        | 1         |
| C6   | 0.5888(4)  | 0.2852(4)  | 0.1766(3)  | 0.016(1)        | 1         |
| C7   | 0.6607(4)  | 0.4574(4)  | 0.1158(3)  | 0.018(1)        | 1         |
| C8   | 0.7709(4)  | 0.4171(5)  | 0.0843(3)  | 0.025(1)        | 1         |
| C9   | 0.6445(4)  | 0.5611(4)  | 0.0947(3)  | 0.018(1)        | 1         |
| C10  | 0.5419(4)  | 0.6025(4)  | 0.1014(3)  | 0.017(1)        | 1         |
| C11  | 0.5473(4)  | 0.7061(4)  | 0.0608(3)  | 0.020(1)        | 1         |
| C12  | 0.3326(4)  | 0.5822(4)  | 0.1393(3)  | 0.016(1)        | 1         |
| C13  | 0.3261(4)  | 0.7063(4)  | 0.1616(3)  | 0.020(1)        | 1         |
| C14  | 0.2142(4)  | 0.7286(4)  | 0.1679(3)  | 0.024(1)        | 1         |
| C15  | 0.1056(4)  | 0.6275(5)  | 0.1554(3)  | 0.026(1)        | 1         |
| C16  | 0.1092(4)  | 0.5040(4)  | 0.1360(3)  | 0.020(1)        | 1         |
| C17  | 0.2209(4)  | 0.4770(4)  | 0.1253(3)  | 0.015(1)        | 1         |
| C18  | 0.1618(4)  | 0.2478(4)  | 0.0544(3)  | 0.018(1)        | 1         |
| C19  | 0.0508(5)  | 0.2431(5)  | 0.0008(3)  | 0.028(1)        | 1         |
| C20  | 0.1853(4)  | 0.1307(4)  | 0.0365(3)  | 0.017(1)        | 1         |
| C21  | 0.2880(4)  | 0.1067(4)  | 0.0665(3)  | 0.017(1)        | 1         |
| C22  | 0.3024(4)  | -0.0222(4) | 0.0197(3)  | 0.025(1)        | 1         |
| C23  | 0.2177(4)  | 0.2088(4)  | 0.2875(3)  | 0.020(1)        | 1         |
| C24  | 0.1653(4)  | 0.0748(4)  | 0.2593(3)  | 0.025(1)        | 1         |
| C25  | 0.0446(5)  | 0.0146(5)  | 0.2210(3)  | 0.029(1)        | 1         |
| C26  | -0.0244(5) | 0.0876(5)  | 0.2070(3)  | 0.031(1)        | 1         |
| C27  | 0.0252(4)  | 0.2196(5)  | 0.2313(3)  | 0.026(1)        | 1         |
| C28  | 0.1455(4)  | 0.2828(4)  | 0.2741(3)  | 0.020(1)        | 1         |
| C29  | 0.1612(4)  | 0.5072(5)  | 0.3392(3)  | 0.024(1)        | 1         |
| C30  | 0.0315(5)  | 0.4724(6)  | 0.3669(4)  | 0.037(1)        | 1         |
| C31  | 0.2304(5)  | 0.6377(5)  | 0.3659(3)  | 0.027(1)        | 1         |
| C32  | 0.3567(4)  | 0.6958(4)  | 0.3641(3)  | 0.024(1)        | 1         |
| C33  | 0.4081(5)  | 0.8405(5)  | 0.4110(4)  | 0.038(1)        | 1         |
| C34  | 0.5591(4)  | 0.6816(4)  | 0.3266(3)  | 0.021(1)        | 1         |
| C35  | 0.6197(5)  | 0.7941(5)  | 0.3067(3)  | 0.032(1)        | 1         |
| C36  | 0.7447(5)  | 0.8297(5)  | 0.3001(4)  | 0.041(2)        | 1         |
| C37  | 0.8116(5)  | 0.7558(5)  | 0.3111(3)  | 0.027(1)        | 1         |
| C38  | 0.7565(5)  | 0.6436(5)  | 0.3282(3)  | 0.031(1)        | 1         |
| C39  | 0.6295(4)  | 0.6049(4)  | 0.3376(3)  | 0.021(1)        | 1         |
| C40  | 0.5934(4)  | 0.4441(4)  | 0.4082(3)  | 0.020(1)        | 1         |
| C41  | 0.7090(5)  | 0.5185(5)  | 0.4708(3)  | 0.030(1)        | 1         |
| C42  | 0.5181(5)  | 0.3314(5)  | 0.4211(3)  | 0.026(1)        | 1         |
| C43  | 0.3983(4)  | 0.2569(4)  | 0.3844(3)  | 0.022(1)        | 1         |
| C44  | 0.3311(5)  | 0.1556(5)  | 0.4237(3)  | 0.034(1)        | 1         |
| C45  | 0.9284(19) | 0.1803(17) | 0.4516(10) | 0.073(6)        | 0.50      |
| C46  | 0.9036(11) | 0.1078(15) | 0.4883(8)  | 0.143(6)        | 1         |
| C47  | 1.0088(12) | 0.0502(14) | 0.4804(10) | 0.171(12)       | 1         |
| N1   | 0.3723(3)  | 0.1964(3)  | 0.1285(2)  | 0.016(1)        | 1         |
| N2   | 0.5791(3)  | 0.3923(3)  | 0.1569(2)  | 0.014(1)        | 1         |
| N3   | 0.4436(3)  | 0.5510(3)  | 0.1371(2)  | 0.013(1)        | 1         |

|     |           |           |           |          |   |
|-----|-----------|-----------|-----------|----------|---|
| N4  | 0.2353(3) | 0.3551(3) | 0.1103(2) | 0.014(1) | 1 |
| N5  | 0.3418(3) | 0.2770(3) | 0.3213(2) | 0.018(1) | 1 |
| N6  | 0.5600(3) | 0.4860(3) | 0.3479(2) | 0.019(1) | 1 |
| N7  | 0.4291(4) | 0.6296(4) | 0.3278(2) | 0.020(1) | 1 |
| N8  | 0.2087(3) | 0.4173(4) | 0.2978(2) | 0.018(1) | 1 |
| Ce1 | 0.3973(1) | 0.4121(1) | 0.2285(1) | 0.015(1) | 1 |

$U_{eq}$  is defined as one third of the orthogonalized  $U_{ij}$  tensor

Table 2. Anisotropic Displacement Parameters

| atom | $U_{11}$  | $U_{22}$  | $U_{33}$  | $U_{12}$   | $U_{13}$  | $U_{23}$   |
|------|-----------|-----------|-----------|------------|-----------|------------|
| C1   | 0.018(2)  | 0.019(2)  | 0.021(2)  | 0.009(2)   | 0.007(2)  | 0.011(2)   |
| C2   | 0.020(2)  | 0.022(2)  | 0.034(3)  | 0.016(2)   | 0.009(2)  | 0.007(2)   |
| C3   | 0.030(3)  | 0.031(3)  | 0.039(3)  | 0.023(2)   | 0.005(2)  | 0.016(2)   |
| C4   | 0.023(3)  | 0.038(3)  | 0.037(3)  | 0.022(2)   | 0.004(2)  | 0.016(2)   |
| C5   | 0.018(2)  | 0.027(3)  | 0.029(2)  | 0.014(2)   | 0.005(2)  | 0.010(2)   |
| C6   | 0.016(2)  | 0.018(2)  | 0.021(2)  | 0.010(2)   | 0.007(2)  | 0.009(2)   |
| C7   | 0.010(2)  | 0.022(2)  | 0.021(2)  | 0.009(2)   | 0.002(2)  | 0.006(2)   |
| C8   | 0.015(2)  | 0.028(3)  | 0.037(3)  | 0.019(2)   | 0.007(2)  | 0.007(2)   |
| C9   | 0.011(2)  | 0.021(2)  | 0.029(2)  | 0.017(2)   | 0.007(2)  | 0.004(2)   |
| C10  | 0.018(2)  | 0.014(2)  | 0.019(2)  | 0.009(2)   | 0.000(2)  | 0.004(2)   |
| C11  | 0.022(2)  | 0.020(2)  | 0.024(2)  | 0.017(2)   | 0.008(2)  | 0.007(2)   |
| C12  | 0.012(2)  | 0.025(2)  | 0.016(2)  | 0.012(2)   | 0.003(2)  | 0.008(2)   |
| C13  | 0.019(2)  | 0.018(2)  | 0.025(2)  | 0.012(2)   | 0.003(2)  | 0.004(2)   |
| C14  | 0.028(3)  | 0.019(2)  | 0.036(3)  | 0.017(2)   | 0.006(2)  | 0.014(2)   |
| C15  | 0.017(2)  | 0.035(3)  | 0.036(3)  | 0.019(2)   | 0.005(2)  | 0.015(2)   |
| C16  | 0.010(2)  | 0.025(2)  | 0.029(2)  | 0.013(2)   | 0.002(2)  | 0.007(2)   |
| C17  | 0.013(2)  | 0.021(2)  | 0.015(2)  | 0.012(2)   | 0.001(2)  | 0.007(2)   |
| C18  | 0.010(2)  | 0.027(3)  | 0.022(2)  | 0.015(2)   | 0.007(2)  | 0.006(2)   |
| C19  | 0.025(3)  | 0.028(3)  | 0.030(3)  | 0.008(2)   | -0.006(2) | 0.008(2)   |
| C20  | 0.015(2)  | 0.017(2)  | 0.021(2)  | 0.009(2)   | 0.004(2)  | 0.002(2)   |
| C21  | 0.018(2)  | 0.020(2)  | 0.020(2)  | 0.014(2)   | 0.010(2)  | 0.007(2)   |
| C22  | 0.025(3)  | 0.021(2)  | 0.031(3)  | 0.010(2)   | 0.005(2)  | 0.008(2)   |
| C23  | 0.020(2)  | 0.025(2)  | 0.018(2)  | 0.012(2)   | 0.006(2)  | 0.005(2)   |
| C24  | 0.029(3)  | 0.024(3)  | 0.025(2)  | 0.011(2)   | 0.012(2)  | 0.008(2)   |
| C25  | 0.034(3)  | 0.023(3)  | 0.025(3)  | 0.011(2)   | 0.012(2)  | -0.001(2)  |
| C26  | 0.024(3)  | 0.035(3)  | 0.025(3)  | 0.009(2)   | 0.008(2)  | -0.002(2)  |
| C27  | 0.021(2)  | 0.035(3)  | 0.025(2)  | 0.013(2)   | 0.010(2)  | 0.011(2)   |
| C28  | 0.020(2)  | 0.024(2)  | 0.019(2)  | 0.011(2)   | 0.010(2)  | 0.007(2)   |
| C29  | 0.020(2)  | 0.036(3)  | 0.024(2)  | 0.015(2)   | 0.006(2)  | 0.016(2)   |
| C30  | 0.022(3)  | 0.045(3)  | 0.039(3)  | 0.004(3)   | 0.007(2)  | 0.013(3)   |
| C31  | 0.030(3)  | 0.028(3)  | 0.030(3)  | 0.010(2)   | 0.003(2)  | 0.020(2)   |
| C32  | 0.030(3)  | 0.023(3)  | 0.023(2)  | 0.010(2)   | -0.004(2) | 0.011(2)   |
| C33  | 0.041(3)  | 0.027(3)  | 0.046(3)  | 0.007(2)   | 0.000(3)  | 0.017(3)   |
| C34  | 0.020(2)  | 0.023(2)  | 0.019(2)  | 0.012(2)   | -0.003(2) | 0.002(2)   |
| C35  | 0.035(3)  | 0.024(3)  | 0.038(3)  | 0.019(2)   | -0.006(2) | 0.001(2)   |
| C36  | 0.034(3)  | 0.038(3)  | 0.039(3)  | 0.021(3)   | -0.007(3) | -0.013(3)  |
| C37  | 0.018(3)  | 0.025(3)  | 0.028(3)  | 0.012(2)   | -0.003(2) | -0.010(2)  |
| C38  | 0.024(3)  | 0.044(3)  | 0.023(2)  | 0.011(2)   | -0.001(2) | 0.011(2)   |
| C39  | 0.018(2)  | 0.023(2)  | 0.021(2)  | 0.009(2)   | -0.002(2) | 0.003(2)   |
| C40  | 0.021(2)  | 0.027(3)  | 0.020(2)  | 0.010(2)   | 0.004(2)  | 0.016(2)   |
| C41  | 0.028(3)  | 0.037(3)  | 0.029(3)  | 0.013(2)   | -0.002(2) | 0.013(2)   |
| C42  | 0.034(3)  | 0.032(3)  | 0.025(2)  | 0.017(2)   | 0.004(2)  | 0.020(2)   |
| C43  | 0.029(3)  | 0.021(2)  | 0.025(2)  | 0.016(2)   | 0.011(2)  | 0.013(2)   |
| C44  | 0.039(3)  | 0.035(3)  | 0.036(3)  | 0.026(2)   | 0.006(2)  | 0.009(2)   |
| C45  | 0.116(15) | 0.072(11) | 0.040(8)  | 0.030(8)   | 0.050(9)  | 0.032(10)  |
| C46  | 0.087(8)  | 0.180(14) | 0.088(8)  | -0.053(9)  | 0.026(7)  | 0.033(9)   |
| C47  | 0.048(6)  | 0.20(2)   | 0.121(13) | -0.090(12) | 0.044(6)  | -0.027(10) |
| N1   | 0.014(2)  | 0.015(2)  | 0.023(2)  | 0.013(2)   | 0.007(2)  | 0.006(2)   |
| N2   | 0.009(2)  | 0.017(2)  | 0.020(2)  | 0.009(2)   | 0.003(2)  | 0.005(2)   |
| N3   | 0.013(2)  | 0.015(2)  | 0.020(2)  | 0.016(2)   | 0.007(2)  | 0.006(2)   |
| N4   | 0.012(2)  | 0.015(2)  | 0.020(2)  | 0.010(2)   | 0.007(2)  | 0.005(2)   |



|     |          |          |          |          |          |          |
|-----|----------|----------|----------|----------|----------|----------|
| N5  | 0.020(2) | 0.017(2) | 0.021(2) | 0.015(2) | 0.009(2) | 0.004(2) |
| N6  | 0.017(2) | 0.018(2) | 0.023(2) | 0.011(2) | 0.004(2) | 0.005(2) |
| N7  | 0.022(2) | 0.017(2) | 0.025(2) | 0.012(2) | 0.001(2) | 0.007(2) |
| N8  | 0.013(2) | 0.022(2) | 0.021(2) | 0.010(2) | 0.006(2) | 0.006(2) |
| Ce1 | 0.014(1) | 0.018(1) | 0.019(1) | 0.012(1) | 0.003(1) | 0.006(1) |

The general temperature factor expression:

$$\exp(-2\pi^2(a^2U_{11}h^2 + b^2U_{22}k^2 + c^2U_{33}l^2 + 2a*b*U_{12}hk + 2a*c*U_{13}hl + 2b*c*U_{23}kl))$$

Table 3. Bond Lengths(Å)

| atom | atom | distance | atom | atom | distance |
|------|------|----------|------|------|----------|
| C1   | C2   | 1.399(6) | C1   | N1   | 1.405(6) |
| C1   | C6   | 1.418(6) | C1   | Ce1  | 3.004(4) |
| C2   | C3   | 1.383(7) | C2   | H2   | 0.9500   |
| C3   | C4   | 1.399(7) | C3   | H3   | 0.9500   |
| C4   | C5   | 1.374(7) | C4   | H4   | 0.9500   |
| C5   | C6   | 1.396(6) | C5   | H5   | 0.9500   |
| C6   | N2   | 1.405(6) | C6   | Ce1  | 2.980(4) |
| C7   | N2   | 1.332(5) | C7   | C9   | 1.405(6) |
| C7   | C8   | 1.512(6) | C8   | H8A  | 0.9800   |
| C8   | H8B  | 0.9800   | C8   | H8C  | 0.9800   |
| C9   | C10  | 1.389(6) | C9   | H9   | 0.9500   |
| C10  | N3   | 1.328(5) | C10  | C11  | 1.523(6) |
| C11  | H11A | 0.9800   | C11  | H11B | 0.9800   |
| C11  | H11C | 0.9800   | C12  | C13  | 1.392(6) |
| C12  | N3   | 1.418(5) | C12  | C17  | 1.425(6) |
| C12  | Ce1  | 3.030(4) | C13  | C14  | 1.377(6) |
| C13  | H13  | 0.9500   | C14  | C15  | 1.380(7) |
| C14  | H14  | 0.9500   | C15  | C16  | 1.377(6) |
| C15  | H15  | 0.9500   | C16  | C17  | 1.402(6) |
| C16  | H16  | 0.9500   | C17  | N4   | 1.414(5) |
| C17  | Ce1  | 3.026(4) | C18  | N4   | 1.320(6) |
| C18  | C20  | 1.403(6) | C18  | C19  | 1.517(6) |
| C19  | H19A | 0.9800   | C19  | H19B | 0.9800   |
| C19  | H19C | 0.9800   | C20  | C21  | 1.404(6) |
| C20  | H20  | 0.9500   | C21  | N1   | 1.331(6) |
| C21  | C22  | 1.512(6) | C22  | H22A | 0.9800   |
| C22  | H22B | 0.9800   | C22  | H22C | 0.9800   |
| C23  | C24  | 1.400(6) | C23  | N5   | 1.406(6) |
| C23  | C28  | 1.415(6) | C23  | Ce1  | 3.016(4) |
| C24  | C25  | 1.383(7) | C24  | H24  | 0.9500   |
| C25  | C26  | 1.381(7) | C25  | H25  | 0.9500   |
| C26  | C27  | 1.379(7) | C26  | H26  | 0.9500   |
| C27  | C28  | 1.407(7) | C27  | H27  | 0.9500   |
| C28  | N8   | 1.422(6) | C28  | Ce1  | 3.019(4) |
| C29  | N8   | 1.324(6) | C29  | C31  | 1.397(7) |
| C29  | C30  | 1.520(7) | C30  | H30A | 0.9800   |
| C30  | H30B | 0.9800   | C30  | H30C | 0.9800   |
| C31  | C32  | 1.396(7) | C31  | H31  | 0.9500   |
| C32  | N7   | 1.319(6) | C32  | C33  | 1.529(7) |
| C33  | H33A | 0.9800   | C33  | H33B | 0.9800   |
| C33  | H33C | 0.9800   | C34  | C35  | 1.407(6) |
| C34  | C39  | 1.413(6) | C34  | N7   | 1.422(6) |
| C34  | Ce1  | 3.012(4) | C35  | C36  | 1.373(8) |
| C35  | H35  | 0.9500   | C36  | C37  | 1.355(8) |
| C36  | H36  | 0.9500   | C37  | C38  | 1.369(7) |
| C37  | H37  | 0.9500   | C38  | C39  | 1.405(7) |
| C38  | H38  | 0.9500   | C39  | N6   | 1.419(6) |
| C39  | Ce1  | 3.016(4) | C40  | N6   | 1.327(6) |
| C40  | C42  | 1.399(7) | C40  | C41  | 1.513(7) |
| C41  | H41A | 0.9800   | C41  | H41B | 0.9800   |
| C41  | H41C | 0.9800   | C42  | C43  | 1.388(7) |

|     |       |          |     |      |          |
|-----|-------|----------|-----|------|----------|
| C42 | H42   | 0.9500   | C43 | N5   | 1.333(6) |
| C43 | C44   | 1.512(6) | C44 | H44A | 0.9800   |
| C44 | H44B  | 0.9800   | C44 | H44C | 0.9800   |
| C45 | C46   | 1.14(2)  | C46 | C47  | 1.53(2)  |
| C47 | C47#1 | 1.45(4)  | N1  | Ce1  | 2.460(4) |
| N2  | Ce1   | 2.428(3) | N3  | Ce1  | 2.460(3) |
| N4  | Ce1   | 2.462(4) | N5  | Ce1  | 2.450(3) |
| N6  | Ce1   | 2.449(4) | N7  | Ce1  | 2.456(4) |
| N8  | Ce1   | 2.448(4) |     |      |          |

Table 4. Bond Angles(°)

| atom | atom | atom | angle    | atom | atom | atom | angle     |
|------|------|------|----------|------|------|------|-----------|
| C2   | C1   | N1   | 124.7(4) | C2   | C1   | C6   | 119.0(4)  |
| N1   | C1   | C6   | 115.8(4) | C2   | C1   | Ce1  | 136.3(3)  |
| N1   | C1   | Ce1  | 54.1(2)  | C6   | C1   | Ce1  | 75.3(2)   |
| C3   | C2   | C1   | 121.0(4) | C3   | C2   | H2   | 119.5     |
| C1   | C2   | H2   | 119.5    | C2   | C3   | C4   | 119.8(4)  |
| C2   | C3   | H3   | 120.1    | C4   | C3   | H3   | 120.1     |
| C5   | C4   | C3   | 120.0(4) | C5   | C4   | H4   | 120.0     |
| C3   | C4   | H4   | 120.0    | C4   | C5   | C6   | 121.3(4)  |
| C4   | C5   | H5   | 119.4    | C6   | C5   | H5   | 119.4     |
| C5   | C6   | N2   | 124.7(4) | C5   | C6   | C1   | 119.0(4)  |
| N2   | C6   | C1   | 115.8(4) | C5   | C6   | Ce1  | 134.3(3)  |
| N2   | C6   | Ce1  | 53.7(2)  | C1   | C6   | Ce1  | 77.2(2)   |
| N2   | C7   | C9   | 121.8(4) | N2   | C7   | C8   | 121.2(4)  |
| C9   | C7   | C8   | 116.8(4) | C7   | C8   | H8A  | 109.5     |
| C7   | C8   | H8B  | 109.5    | H8A  | C8   | H8B  | 109.5     |
| C7   | C8   | H8C  | 109.5    | H8A  | C8   | H8C  | 109.5     |
| H8B  | C8   | H8C  | 109.5    | C10  | C9   | C7   | 128.6(4)  |
| C10  | C9   | H9   | 115.7    | C7   | C9   | H9   | 115.7     |
| N3   | C10  | C9   | 122.2(4) | N3   | C10  | C11  | 122.5(4)  |
| C9   | C10  | C11  | 115.2(4) | C10  | C11  | H11A | 109.5     |
| C10  | C11  | H11B | 109.5    | H11A | C11  | H11B | 109.5     |
| C10  | C11  | H11C | 109.5    | H11A | C11  | H11C | 109.5     |
| H11B | C11  | H11C | 109.5    | C13  | C12  | N3   | 125.1(4)  |
| C13  | C12  | C17  | 118.9(4) | N3   | C12  | C17  | 115.7(4)  |
| C13  | C12  | Ce1  | 137.7(3) | N3   | C12  | Ce1  | 53.29(19) |
| C17  | C12  | Ce1  | 76.2(2)  | C14  | C13  | C12  | 121.3(4)  |
| C14  | C13  | H13  | 119.3    | C12  | C13  | H13  | 119.3     |
| C13  | C14  | C15  | 120.2(4) | C13  | C14  | H14  | 119.9     |
| C15  | C14  | H14  | 119.9    | C16  | C15  | C14  | 119.8(4)  |
| C16  | C15  | H15  | 120.1    | C14  | C15  | H15  | 120.1     |
| C15  | C16  | C17  | 121.5(4) | C15  | C16  | H16  | 119.2     |
| C17  | C16  | H16  | 119.2    | C16  | C17  | N4   | 125.8(4)  |
| C16  | C17  | C12  | 118.1(4) | N4   | C17  | C12  | 115.7(4)  |
| C16  | C17  | Ce1  | 137.0(3) | N4   | C17  | Ce1  | 53.5(2)   |
| C12  | C17  | Ce1  | 76.5(2)  | N4   | C18  | C20  | 122.1(4)  |
| N4   | C18  | C19  | 122.9(4) | C20  | C18  | C19  | 114.9(4)  |
| C18  | C19  | H19A | 109.5    | C18  | C19  | H19B | 109.5     |
| H19A | C19  | H19B | 109.5    | C18  | C19  | H19C | 109.5     |
| H19A | C19  | H19C | 109.5    | H19B | C19  | H19C | 109.5     |
| C18  | C20  | C21  | 128.8(4) | C18  | C20  | H20  | 115.6     |
| C21  | C20  | H20  | 115.6    | N1   | C21  | C20  | 121.4(4)  |
| N1   | C21  | C22  | 122.2(4) | C20  | C21  | C22  | 116.2(4)  |
| C21  | C22  | H22A | 109.5    | C21  | C22  | H22B | 109.5     |
| H22A | C22  | H22B | 109.5    | C21  | C22  | H22C | 109.5     |
| H22A | C22  | H22C | 109.5    | H22B | C22  | H22C | 109.5     |
| C24  | C23  | N5   | 125.0(4) | C24  | C23  | C28  | 118.5(4)  |
| N5   | C23  | C28  | 116.2(4) | C24  | C23  | Ce1  | 137.8(3)  |
| N5   | C23  | Ce1  | 53.3(2)  | C28  | C23  | Ce1  | 76.5(2)   |
| C25  | C24  | C23  | 121.4(5) | C25  | C24  | H24  | 119.3     |
| C23  | C24  | H24  | 119.3    | C26  | C25  | C24  | 119.5(5)  |

|      |     |      |            |       |     |      |            |
|------|-----|------|------------|-------|-----|------|------------|
| C26  | C25 | H25  | 120.2      | C24   | C25 | H25  | 120.2      |
| C27  | C26 | C25  | 120.8(5)   | C27   | C26 | H26  | 119.6      |
| C25  | C26 | H26  | 119.6      | C26   | C27 | C28  | 120.4(5)   |
| C26  | C27 | H27  | 119.8      | C28   | C27 | H27  | 119.8      |
| C27  | C28 | C23  | 119.2(4)   | C27   | C28 | N8   | 125.3(4)   |
| C23  | C28 | N8   | 115.1(4)   | C27   | C28 | Ce1  | 136.5(3)   |
| C23  | C28 | Ce1  | 76.3(2)    | N8    | C28 | Ce1  | 53.2(2)    |
| N8   | C29 | C31  | 122.1(4)   | N8    | C29 | C30  | 121.3(4)   |
| C31  | C29 | C30  | 116.4(4)   | C29   | C30 | H30A | 109.5      |
| C29  | C30 | H30B | 109.5      | H30A  | C30 | H30B | 109.5      |
| C29  | C30 | H30C | 109.5      | H30A  | C30 | H30C | 109.5      |
| H30B | C30 | H30C | 109.5      | C32   | C31 | C29  | 129.0(4)   |
| C32  | C31 | H31  | 115.5      | C29   | C31 | H31  | 115.5      |
| N7   | C32 | C31  | 122.4(4)   | N7    | C32 | C33  | 121.6(4)   |
| C31  | C32 | C33  | 116.0(4)   | C32   | C33 | H33A | 109.5      |
| C32  | C33 | H33B | 109.5      | H33A  | C33 | H33B | 109.5      |
| C32  | C33 | H33C | 109.5      | H33A  | C33 | H33C | 109.5      |
| H33B | C33 | H33C | 109.5      | C35   | C34 | C39  | 118.3(4)   |
| C35  | C34 | N7   | 125.6(4)   | C39   | C34 | N7   | 115.8(4)   |
| C35  | C34 | Ce1  | 136.3(3)   | C39   | C34 | Ce1  | 76.6(3)    |
| N7   | C34 | Ce1  | 53.8(2)    | C36   | C35 | C34  | 120.8(5)   |
| C36  | C35 | H35  | 119.6      | C34   | C35 | H35  | 119.6      |
| C37  | C36 | C35  | 120.5(5)   | C37   | C36 | H36  | 119.8      |
| C35  | C36 | H36  | 119.8      | C36   | C37 | C38  | 121.1(5)   |
| C36  | C37 | H37  | 119.4      | C38   | C37 | H37  | 119.4      |
| C37  | C38 | C39  | 120.4(5)   | C37   | C38 | H38  | 119.8      |
| C39  | C38 | H38  | 119.8      | C38   | C39 | C34  | 118.9(4)   |
| C38  | C39 | N6   | 125.5(4)   | C34   | C39 | N6   | 115.1(4)   |
| C38  | C39 | Ce1  | 136.2(3)   | C34   | C39 | Ce1  | 76.3(2)    |
| N6   | C39 | Ce1  | 53.3(2)    | N6    | C40 | C42  | 121.2(4)   |
| N6   | C40 | C41  | 122.7(4)   | C42   | C40 | C41  | 115.9(4)   |
| C40  | C41 | H41A | 109.5      | C40   | C41 | H41B | 109.5      |
| H41A | C41 | H41B | 109.5      | C40   | C41 | H41C | 109.5      |
| H41A | C41 | H41C | 109.5      | H41B  | C41 | H41C | 109.5      |
| C43  | C42 | C40  | 128.6(4)   | C43   | C42 | H42  | 115.7      |
| C40  | C42 | H42  | 115.7      | N5    | C43 | C42  | 122.5(4)   |
| N5   | C43 | C44  | 121.0(4)   | C42   | C43 | C44  | 116.3(4)   |
| C43  | C44 | H44A | 109.5      | C43   | C44 | H44B | 109.5      |
| H44A | C44 | H44B | 109.5      | C43   | C44 | H44C | 109.5      |
| H44A | C44 | H44C | 109.5      | H44B  | C44 | H44C | 109.5      |
| C45  | C46 | C47  | 105.7(15)  | C47#1 | C47 | C46  | 114.3(13)  |
| C21  | N1  | C1   | 124.3(4)   | C21   | N1  | Ce1  | 137.1(3)   |
| C1   | N1  | Ce1  | 98.3(3)    | C7    | N2  | C6   | 123.9(4)   |
| C7   | N2  | Ce1  | 137.3(3)   | C6    | N2  | Ce1  | 98.6(2)    |
| C10  | N3  | C12  | 124.5(3)   | C10   | N3  | Ce1  | 135.8(3)   |
| C12  | N3  | Ce1  | 99.2(2)    | C18   | N4  | C17  | 124.0(4)   |
| C18  | N4  | Ce1  | 136.2(3)   | C17   | N4  | Ce1  | 99.0(2)    |
| C43  | N5  | C23  | 123.4(4)   | C43   | N5  | Ce1  | 137.2(3)   |
| C23  | N5  | Ce1  | 99.3(3)    | C40   | N6  | C39  | 122.5(4)   |
| C40  | N6  | Ce1  | 138.4(3)   | C39   | N6  | Ce1  | 99.0(3)    |
| C32  | N7  | C34  | 125.4(4)   | C32   | N7  | Ce1  | 135.5(3)   |
| C34  | N7  | Ce1  | 98.4(3)    | C29   | N8  | C28  | 124.6(4)   |
| C29  | N8  | Ce1  | 136.1(3)   | C28   | N8  | Ce1  | 99.1(3)    |
| N2   | Ce1 | N8   | 176.39(11) | N2    | Ce1 | N6   | 76.58(12)  |
| N8   | Ce1 | N6   | 104.61(12) | N2    | Ce1 | N5   | 112.41(12) |
| N8   | Ce1 | N5   | 65.22(12)  | N6    | Ce1 | N5   | 69.90(12)  |
| N2   | Ce1 | N7   | 112.80(12) | N8    | Ce1 | N7   | 70.69(13)  |

|    |     |     |            |     |     |     |            |
|----|-----|-----|------------|-----|-----|-----|------------|
| N6 | Ce1 | N7  | 64.95(12)  | N5  | Ce1 | N7  | 103.33(12) |
| N2 | Ce1 | N1  | 65.42(12)  | N8  | Ce1 | N1  | 111.09(12) |
| N6 | Ce1 | N1  | 113.98(12) | N5  | Ce1 | N1  | 77.40(12)  |
| N7 | Ce1 | N1  | 178.20(11) | N2  | Ce1 | N3  | 70.47(12)  |
| N8 | Ce1 | N3  | 111.90(12) | N6  | Ce1 | N3  | 111.44(12) |
| N5 | Ce1 | N3  | 177.12(10) | N7  | Ce1 | N3  | 75.32(12)  |
| N1 | Ce1 | N3  | 104.03(12) | N2  | Ce1 | N4  | 104.33(11) |
| N8 | Ce1 | N4  | 74.75(12)  | N6  | Ce1 | N4  | 175.64(11) |
| N5 | Ce1 | N4  | 113.26(12) | N7  | Ce1 | N4  | 110.97(12) |
| N1 | Ce1 | N4  | 70.06(12)  | N3  | Ce1 | N4  | 65.25(11)  |
| N2 | Ce1 | C6  | 27.78(12)  | N8  | Ce1 | C6  | 149.26(12) |
| N6 | Ce1 | C6  | 70.04(12)  | N5  | Ce1 | C6  | 85.10(12)  |
| N7 | Ce1 | C6  | 127.23(12) | N1  | Ce1 | C6  | 51.07(12)  |
| N3 | Ce1 | C6  | 97.74(11)  | N4  | Ce1 | C6  | 112.78(12) |
| N2 | Ce1 | C1  | 50.89(12)  | N8  | Ce1 | C1  | 125.58(12) |
| N6 | Ce1 | C1  | 86.76(12)  | N5  | Ce1 | C1  | 69.94(12)  |
| N7 | Ce1 | C1  | 151.11(12) | N1  | Ce1 | C1  | 27.56(12)  |
| N3 | Ce1 | C1  | 112.49(12) | N4  | Ce1 | C1  | 97.12(12)  |
| C6 | Ce1 | C1  | 27.42(11)  | N2  | Ce1 | C34 | 85.29(12)  |
| N8 | Ce1 | C34 | 98.11(12)  | N6  | Ce1 | C34 | 50.63(12)  |
| N5 | Ce1 | C34 | 112.00(12) | N7  | Ce1 | C34 | 27.85(13)  |
| N1 | Ce1 | C34 | 150.35(12) | N3  | Ce1 | C34 | 68.00(12)  |
| N4 | Ce1 | C34 | 125.05(12) | C6  | Ce1 | C34 | 100.45(12) |
| C1 | Ce1 | C34 | 126.88(12) | N2  | Ce1 | C23 | 125.95(12) |
| N8 | Ce1 | C23 | 50.69(12)  | N6  | Ce1 | C23 | 96.83(12)  |
| N5 | Ce1 | C23 | 27.39(12)  | N7  | Ce1 | C23 | 112.01(12) |
| N1 | Ce1 | C23 | 69.39(12)  | N3  | Ce1 | C23 | 150.71(12) |
| N4 | Ce1 | C23 | 86.10(12)  | C6  | Ce1 | C23 | 99.03(12)  |
| C1 | Ce1 | C23 | 75.43(12)  | C34 | Ce1 | C23 | 131.32(12) |

Table 5. Torsion Angles(°)

| atom | atom | atom | atom  | angle      | atom | atom | atom | atom | angle     |
|------|------|------|-------|------------|------|------|------|------|-----------|
| N1   | C1   | C2   | C3    | -172.3(4)  | C6   | C1   | C2   | C3   | -0.9(7)   |
| Ce1  | C1   | C2   | C3    | -100.2(5)  | C1   | C2   | C3   | C4   | 2.3(8)    |
| C2   | C3   | C4   | C5    | -1.4(8)    | C3   | C4   | C5   | C6   | -0.9(8)   |
| C4   | C5   | C6   | N2    | 173.8(4)   | C4   | C5   | C6   | C1   | 2.2(7)    |
| C4   | C5   | C6   | Ce1   | 103.1(5)   | C2   | C1   | C6   | C5   | -1.3(6)   |
| N1   | C1   | C6   | C5    | 170.8(4)   | Ce1  | C1   | C6   | C5   | 133.9(4)  |
| C2   | C1   | C6   | N2    | -173.6(4)  | N1   | C1   | C6   | N2   | -1.5(6)   |
| Ce1  | C1   | C6   | N2    | -38.4(3)   | C2   | C1   | C6   | Ce1  | -135.2(4) |
| N1   | C1   | C6   | Ce1   | 36.9(3)    | N2   | C7   | C9   | C10  | -8.9(7)   |
| C8   | C7   | C9   | C10   | 167.2(4)   | C7   | C9   | C10  | N3   | 5.6(7)    |
| C7   | C9   | C10  | C11   | -171.3(4)  | N3   | C12  | C13  | C14  | -175.4(4) |
| C17  | C12  | C13  | C14   | -1.9(6)    | Ce1  | C12  | C13  | C14  | -103.7(5) |
| C12  | C13  | C14  | C15   | 2.7(7)     | C13  | C14  | C15  | C16  | -0.5(7)   |
| C14  | C15  | C16  | C17   | -2.3(7)    | C15  | C16  | C17  | N4   | 176.1(4)  |
| C15  | C16  | C17  | C12   | 3.0(6)     | C15  | C16  | C17  | Ce1  | 103.7(5)  |
| C13  | C12  | C17  | C16   | -0.9(6)    | N3   | C12  | C17  | C16  | 173.2(4)  |
| Ce1  | C12  | C17  | C16   | 136.5(4)   | C13  | C12  | C17  | N4   | -174.7(4) |
| N3   | C12  | C17  | N4    | -0.6(5)    | Ce1  | C12  | C17  | N4   | -37.4(3)  |
| C13  | C12  | C17  | Ce1   | -137.3(4)  | N3   | C12  | C17  | Ce1  | 36.8(3)   |
| N4   | C18  | C20  | C21   | -5.2(7)    | C19  | C18  | C20  | C21  | 171.2(4)  |
| C18  | C20  | C21  | N1    | 9.7(7)     | C18  | C20  | C21  | C22  | -165.5(4) |
| N5   | C23  | C24  | C25   | -175.2(4)  | C28  | C23  | C24  | C25  | -1.7(7)   |
| Ce1  | C23  | C24  | C25   | -103.5(5)  | C23  | C24  | C25  | C26  | 2.7(7)    |
| C24  | C25  | C26  | C27   | -0.5(7)    | C25  | C26  | C27  | C28  | -2.7(7)   |
| C26  | C27  | C28  | C23   | 3.6(7)     | C26  | C27  | C28  | N8   | 176.3(4)  |
| C26  | C27  | C28  | Ce1   | 104.9(5)   | C24  | C23  | C28  | C27  | -1.4(6)   |
| N5   | C23  | C28  | C27   | 172.6(4)   | Ce1  | C23  | C28  | C27  | 136.0(4)  |
| C24  | C23  | C28  | N8    | -174.8(4)  | N5   | C23  | C28  | N8   | -0.8(6)   |
| Ce1  | C23  | C28  | N8    | -37.4(3)   | C24  | C23  | C28  | Ce1  | -137.4(4) |
| N5   | C23  | C28  | Ce1   | 36.6(3)    | N8   | C29  | C31  | C32  | -7.7(8)   |
| C30  | C29  | C31  | C32   | 167.2(5)   | C29  | C31  | C32  | N7   | 6.0(8)    |
| C29  | C31  | C32  | C33   | -170.8(5)  | C39  | C34  | C35  | C36  | -1.3(7)   |
| N7   | C34  | C35  | C36   | -174.3(5)  | Ce1  | C34  | C35  | C36  | -101.9(6) |
| C34  | C35  | C36  | C37   | 1.1(8)     | C35  | C36  | C37  | C38  | 0.7(8)    |
| C36  | C37  | C38  | C39   | -2.3(8)    | C37  | C38  | C39  | C34  | 2.0(7)    |
| C37  | C38  | C39  | N6    | 174.2(4)   | C37  | C38  | C39  | Ce1  | 102.6(6)  |
| C35  | C34  | C39  | C38   | -0.2(6)    | N7   | C34  | C39  | C38  | 173.4(4)  |
| Ce1  | C34  | C39  | C38   | 135.5(4)   | C35  | C34  | C39  | N6   | -173.2(4) |
| N7   | C34  | C39  | N6    | 0.5(6)     | Ce1  | C34  | C39  | N6   | -37.4(3)  |
| C35  | C34  | C39  | Ce1   | -135.8(4)  | N7   | C34  | C39  | Ce1  | 37.9(3)   |
| N6   | C40  | C42  | C43   | -8.1(8)    | C41  | C40  | C42  | C43  | 167.8(5)  |
| C40  | C42  | C43  | N5    | 8.1(8)     | C40  | C42  | C43  | C44  | -168.2(5) |
| C45  | C46  | C47  | C47#1 | -177.0(17) | C20  | C21  | N1   | C1   | -178.8(4) |
| C22  | C21  | N1   | C1    | -3.9(6)    | C20  | C21  | N1   | Ce1  | 8.1(7)    |
| C22  | C21  | N1   | Ce1   | -177.0(3)  | C2   | C1   | N1   | C21  | -49.4(6)  |
| C6   | C1   | N1   | C21   | 138.9(4)   | Ce1  | C1   | N1   | C21  | -175.2(5) |
| C2   | C1   | N1   | Ce1   | 125.8(4)   | C6   | C1   | N1   | Ce1  | -45.8(4)  |
| C9   | C7   | N2   | C6    | 177.6(4)   | C8   | C7   | N2   | C6   | 1.7(7)    |
| C9   | C7   | N2   | Ce1   | -8.6(7)    | C8   | C7   | N2   | Ce1  | 175.5(3)  |
| C5   | C6   | N2   | C7    | 52.7(6)    | C1   | C6   | N2   | C7   | -135.5(4) |
| Ce1  | C6   | N2   | C7    | 175.8(5)   | C5   | C6   | N2   | Ce1  | -123.0(4) |

|     |     |     |     |            |     |     |     |     |           |
|-----|-----|-----|-----|------------|-----|-----|-----|-----|-----------|
| C1  | C6  | N2  | Ce1 | 48.7(4)    | C9  | C10 | N3  | C12 | -174.6(4) |
| C11 | C10 | N3  | C12 | 2.1(6)     | C9  | C10 | N3  | Ce1 | 14.9(7)   |
| C11 | C10 | N3  | Ce1 | -168.3(3)  | C13 | C12 | N3  | C10 | -46.1(6)  |
| C17 | C12 | N3  | C10 | 140.2(4)   | Ce1 | C12 | N3  | C10 | -173.3(5) |
| C13 | C12 | N3  | Ce1 | 127.2(4)   | C17 | C12 | N3  | Ce1 | -46.5(4)  |
| C20 | C18 | N4  | C17 | 174.8(4)   | C19 | C18 | N4  | C17 | -1.3(6)   |
| C20 | C18 | N4  | Ce1 | -17.6(6)   | C19 | C18 | N4  | Ce1 | 166.3(3)  |
| C16 | C17 | N4  | C18 | 45.3(6)    | C12 | C17 | N4  | C18 | -141.4(4) |
| Ce1 | C17 | N4  | C18 | 171.3(4)   | C16 | C17 | N4  | Ce1 | -126.0(4) |
| C12 | C17 | N4  | Ce1 | 47.3(4)    | C42 | C43 | N5  | C23 | -175.2(4) |
| C44 | C43 | N5  | C23 | 0.9(7)     | C42 | C43 | N5  | Ce1 | 7.6(7)    |
| C44 | C43 | N5  | Ce1 | -176.4(3)  | C24 | C23 | N5  | C43 | -50.8(7)  |
| C28 | C23 | N5  | C43 | 135.6(4)   | Ce1 | C23 | N5  | C43 | -178.1(5) |
| C24 | C23 | N5  | Ce1 | 127.3(4)   | C28 | C23 | N5  | Ce1 | -46.3(4)  |
| C42 | C40 | N6  | C39 | 174.9(4)   | C41 | C40 | N6  | C39 | -0.7(7)   |
| C42 | C40 | N6  | Ce1 | -7.5(7)    | C41 | C40 | N6  | Ce1 | 176.8(3)  |
| C38 | C39 | N6  | C40 | 53.4(7)    | C34 | C39 | N6  | C40 | -134.2(4) |
| Ce1 | C39 | N6  | C40 | 178.4(5)   | C38 | C39 | N6  | Ce1 | -125.0(4) |
| C34 | C39 | N6  | Ce1 | 47.4(4)    | C31 | C32 | N7  | C34 | -177.4(4) |
| C33 | C32 | N7  | C34 | -0.7(7)    | C31 | C32 | N7  | Ce1 | 14.9(7)   |
| C33 | C32 | N7  | Ce1 | -168.5(3)  | C35 | C34 | N7  | C32 | -46.0(7)  |
| C39 | C34 | N7  | C32 | 140.9(5)   | Ce1 | C34 | N7  | C32 | -171.4(5) |
| C35 | C34 | N7  | Ce1 | 125.4(4)   | C39 | C34 | N7  | Ce1 | -47.8(4)  |
| C31 | C29 | N8  | C28 | 175.7(4)   | C30 | C29 | N8  | C28 | 1.0(7)    |
| C31 | C29 | N8  | Ce1 | -11.6(7)   | C30 | C29 | N8  | Ce1 | 173.8(3)  |
| C27 | C28 | N8  | C29 | 49.5(6)    | C23 | C28 | N8  | C29 | -137.6(4) |
| Ce1 | C28 | N8  | C29 | 174.9(5)   | C27 | C28 | N8  | Ce1 | -125.5(4) |
| C23 | C28 | N8  | Ce1 | 47.4(4)    | C7  | N2  | Ce1 | N8  | 148.1(15) |
| C6  | N2  | Ce1 | N8  | -37.1(18)  | C7  | N2  | Ce1 | N6  | -102.3(4) |
| C6  | N2  | Ce1 | N6  | 72.5(3)    | C7  | N2  | Ce1 | N5  | -163.5(4) |
| C6  | N2  | Ce1 | N5  | 11.3(3)    | C7  | N2  | Ce1 | N7  | -47.2(4)  |
| C6  | N2  | Ce1 | N7  | 127.6(2)   | C7  | N2  | Ce1 | N1  | 133.1(4)  |
| C6  | N2  | Ce1 | N1  | -52.1(2)   | C7  | N2  | Ce1 | N3  | 16.7(4)   |
| C6  | N2  | Ce1 | N3  | -168.6(3)  | C7  | N2  | Ce1 | N4  | 73.3(4)   |
| C6  | N2  | Ce1 | N4  | -111.9(3)  | C7  | N2  | Ce1 | C6  | -174.8(6) |
| C7  | N2  | Ce1 | C1  | 160.9(5)   | C6  | N2  | Ce1 | C1  | -24.3(2)  |
| C7  | N2  | Ce1 | C34 | -51.7(4)   | C6  | N2  | Ce1 | C34 | 123.1(3)  |
| C7  | N2  | Ce1 | C23 | 169.0(4)   | C6  | N2  | Ce1 | C23 | -16.2(3)  |
| C29 | N8  | Ce1 | N2  | -175.9(15) | C28 | N8  | Ce1 | N2  | -2.0(18)  |
| C29 | N8  | Ce1 | N6  | 75.3(4)    | C28 | N8  | Ce1 | N6  | -110.7(3) |
| C29 | N8  | Ce1 | N5  | 134.5(5)   | C28 | N8  | Ce1 | N5  | -51.5(3)  |
| C29 | N8  | Ce1 | N7  | 19.0(4)    | C28 | N8  | Ce1 | N7  | -167.0(3) |
| C29 | N8  | Ce1 | N1  | -161.3(4)  | C28 | N8  | Ce1 | N1  | 12.7(3)   |
| C29 | N8  | Ce1 | N3  | -45.5(5)   | C28 | N8  | Ce1 | N3  | 128.5(2)  |
| C29 | N8  | Ce1 | N4  | -100.2(4)  | C28 | N8  | Ce1 | N4  | 73.7(3)   |
| C29 | N8  | Ce1 | C6  | 150.7(4)   | C28 | N8  | Ce1 | C6  | -35.3(4)  |
| C29 | N8  | Ce1 | C1  | 171.9(4)   | C28 | N8  | Ce1 | C1  | -14.1(3)  |
| C29 | N8  | Ce1 | C34 | 24.0(4)    | C28 | N8  | Ce1 | C34 | -162.0(3) |
| C29 | N8  | Ce1 | C23 | 162.2(5)   | C28 | N8  | Ce1 | C23 | -23.9(2)  |
| C40 | N6  | Ce1 | N2  | -106.8(5)  | C39 | N6  | Ce1 | N2  | 71.1(3)   |
| C40 | N6  | Ce1 | N8  | 69.7(5)    | C39 | N6  | Ce1 | N8  | -112.4(3) |
| C40 | N6  | Ce1 | N5  | 13.5(4)    | C39 | N6  | Ce1 | N5  | -168.6(3) |
| C40 | N6  | Ce1 | N7  | 129.8(5)   | C39 | N6  | Ce1 | N7  | -52.3(3)  |
| C40 | N6  | Ce1 | N1  | -51.8(5)   | C39 | N6  | Ce1 | N1  | 126.1(3)  |
| C40 | N6  | Ce1 | N3  | -169.2(4)  | C39 | N6  | Ce1 | N3  | 8.7(3)    |
| C40 | N6  | Ce1 | N4  | 150.6(12)  | C39 | N6  | Ce1 | N4  | -31.4(15) |
| C40 | N6  | Ce1 | C6  | -78.5(5)   | C39 | N6  | Ce1 | C6  | 99.4(3)   |



|     |    |     |     |           |     |    |     |     |           |
|-----|----|-----|-----|-----------|-----|----|-----|-----|-----------|
| C40 | N6 | Ce1 | C1  | -56.3(5)  | C39 | N6 | Ce1 | C1  | 121.6(3)  |
| C40 | N6 | Ce1 | C34 | 158.2(5)  | C39 | N6 | Ce1 | C34 | -23.9(2)  |
| C40 | N6 | Ce1 | C23 | 18.6(5)   | C39 | N6 | Ce1 | C23 | -163.5(3) |
| C43 | N5 | Ce1 | N2  | 51.9(5)   | C23 | N5 | Ce1 | N2  | -125.8(3) |
| C43 | N5 | Ce1 | N8  | -131.1(5) | C23 | N5 | Ce1 | N8  | 51.3(3)   |
| C43 | N5 | Ce1 | N6  | -13.4(4)  | C23 | N5 | Ce1 | N6  | 169.0(3)  |
| C43 | N5 | Ce1 | N7  | -70.0(5)  | C23 | N5 | Ce1 | N7  | 112.3(3)  |
| C43 | N5 | Ce1 | N1  | 108.3(5)  | C23 | N5 | Ce1 | N1  | -69.4(3)  |
| C43 | N5 | Ce1 | N3  | -132(2)   | C23 | N5 | Ce1 | N3  | 51(2)     |
| C43 | N5 | Ce1 | N4  | 169.9(4)  | C23 | N5 | Ce1 | N4  | -7.8(3)   |
| C43 | N5 | Ce1 | C6  | 57.1(4)   | C23 | N5 | Ce1 | C6  | -120.5(3) |
| C43 | N5 | Ce1 | C1  | 80.6(4)   | C23 | N5 | Ce1 | C1  | -97.0(3)  |
| C43 | N5 | Ce1 | C34 | -42.2(5)  | C23 | N5 | Ce1 | C34 | 140.2(3)  |
| C43 | N5 | Ce1 | C23 | 177.7(6)  | C32 | N7 | Ce1 | N2  | 160.4(4)  |
| C34 | N7 | Ce1 | N2  | -9.6(3)   | C32 | N7 | Ce1 | N8  | -20.7(4)  |
| C34 | N7 | Ce1 | N8  | 169.4(3)  | C32 | N7 | Ce1 | N6  | -138.0(5) |
| C34 | N7 | Ce1 | N6  | 52.1(2)   | C32 | N7 | Ce1 | N5  | -78.0(4)  |
| C34 | N7 | Ce1 | N5  | 112.1(2)  | C32 | N7 | Ce1 | N1  | 168(3)    |
| C34 | N7 | Ce1 | N1  | -2(3)     | C32 | N7 | Ce1 | N3  | 99.4(4)   |
| C34 | N7 | Ce1 | N3  | -70.5(2)  | C32 | N7 | Ce1 | N4  | 43.7(5)   |
| C34 | N7 | Ce1 | N4  | -126.2(2) | C32 | N7 | Ce1 | C6  | -172.0(4) |
| C34 | N7 | Ce1 | C6  | 18.1(3)   | C32 | N7 | Ce1 | C1  | -150.5(4) |
| C34 | N7 | Ce1 | C1  | 39.6(4)   | C32 | N7 | Ce1 | C34 | 169.9(6)  |
| C32 | N7 | Ce1 | C23 | -50.7(5)  | C34 | N7 | Ce1 | C23 | 139.4(2)  |
| C21 | N1 | Ce1 | N2  | -134.3(4) | C1  | N1 | Ce1 | N2  | 51.5(2)   |
| C21 | N1 | Ce1 | N8  | 46.7(4)   | C1  | N1 | Ce1 | N8  | -127.5(2) |
| C21 | N1 | Ce1 | N6  | 164.6(4)  | C1  | N1 | Ce1 | N6  | -9.6(3)   |
| C21 | N1 | Ce1 | N5  | 103.6(4)  | C1  | N1 | Ce1 | N5  | -70.6(2)  |
| C21 | N1 | Ce1 | N7  | -142(3)   | C1  | N1 | Ce1 | N7  | 43(3)     |
| C21 | N1 | Ce1 | N3  | -73.9(4)  | C1  | N1 | Ce1 | N3  | 111.9(2)  |
| C21 | N1 | Ce1 | N4  | -17.2(4)  | C1  | N1 | Ce1 | N4  | 168.6(3)  |
| C21 | N1 | Ce1 | C6  | -162.5(5) | C1  | N1 | Ce1 | C6  | 23.3(2)   |
| C21 | N1 | Ce1 | C1  | 174.2(6)  | C21 | N1 | Ce1 | C34 | -143.9(4) |
| C1  | N1 | Ce1 | C34 | 41.9(4)   | C21 | N1 | Ce1 | C23 | 76.2(4)   |
| C1  | N1 | Ce1 | C23 | -98.0(3)  | C10 | N3 | Ce1 | N2  | -19.8(4)  |
| C12 | N3 | Ce1 | N2  | 168.1(3)  | C10 | N3 | Ce1 | N8  | 163.1(4)  |
| C12 | N3 | Ce1 | N8  | -9.0(3)   | C10 | N3 | Ce1 | N6  | 46.3(4)   |
| C12 | N3 | Ce1 | N6  | -125.7(2) | C10 | N3 | Ce1 | N5  | 164(2)    |
| C12 | N3 | Ce1 | N5  | -8(2)     | C10 | N3 | Ce1 | N7  | 101.4(4)  |
| C12 | N3 | Ce1 | N7  | -70.7(3)  | C10 | N3 | Ce1 | N1  | -76.9(4)  |
| C12 | N3 | Ce1 | N1  | 111.1(3)  | C10 | N3 | Ce1 | N4  | -136.7(4) |
| C12 | N3 | Ce1 | N4  | 51.2(2)   | C10 | N3 | Ce1 | C6  | -25.2(4)  |
| C12 | N3 | Ce1 | C6  | 162.8(2)  | C10 | N3 | Ce1 | C1  | -49.2(4)  |
| C12 | N3 | Ce1 | C1  | 138.7(2)  | C10 | N3 | Ce1 | C34 | 73.0(4)   |
| C12 | N3 | Ce1 | C34 | -99.0(3)  | C10 | N3 | Ce1 | C23 | -149.7(4) |
| C12 | N3 | Ce1 | C23 | 38.3(4)   | C18 | N4 | Ce1 | N2  | 78.7(4)   |
| C17 | N4 | Ce1 | N2  | -111.6(2) | C18 | N4 | Ce1 | N8  | -97.6(4)  |
| C17 | N4 | Ce1 | N8  | 72.0(2)   | C18 | N4 | Ce1 | N6  | -180(34)  |
| C17 | N4 | Ce1 | N6  | -10.1(15) | C18 | N4 | Ce1 | N5  | -43.8(4)  |
| C17 | N4 | Ce1 | N5  | 125.8(2)  | C18 | N4 | Ce1 | N7  | -159.5(4) |
| C17 | N4 | Ce1 | N7  | 10.1(3)   | C18 | N4 | Ce1 | N1  | 22.1(4)   |
| C17 | N4 | Ce1 | N1  | -168.3(3) | C18 | N4 | Ce1 | N3  | 138.9(4)  |
| C17 | N4 | Ce1 | N3  | -51.5(2)  | C18 | N4 | Ce1 | C6  | 50.8(4)   |
| C17 | N4 | Ce1 | C6  | -139.6(2) | C18 | N4 | Ce1 | C1  | 27.4(4)   |
| C17 | N4 | Ce1 | C1  | -163.0(2) | C18 | N4 | Ce1 | C34 | 173.1(4)  |
| C17 | N4 | Ce1 | C34 | -17.3(3)  | C18 | N4 | Ce1 | C23 | -47.4(4)  |
| C17 | N4 | Ce1 | C23 | 122.2(2)  | C5  | C6 | Ce1 | N2  | 105.7(5)  |

|     |     |     |     |           |     |     |     |     |           |
|-----|-----|-----|-----|-----------|-----|-----|-----|-----|-----------|
| C1  | C6  | Ce1 | N2  | -136.1(4) | C5  | C6  | Ce1 | N8  | -78.6(5)  |
| N2  | C6  | Ce1 | N8  | 175.7(2)  | C1  | C6  | Ce1 | N8  | 39.7(4)   |
| C5  | C6  | Ce1 | N6  | 6.5(4)    | N2  | C6  | Ce1 | N6  | -99.2(3)  |
| C1  | C6  | Ce1 | N6  | 124.7(3)  | C5  | C6  | Ce1 | N5  | -63.9(4)  |
| N2  | C6  | Ce1 | N5  | -169.6(3) | C1  | C6  | Ce1 | N5  | 54.4(2)   |
| C5  | C6  | Ce1 | N7  | 39.2(5)   | N2  | C6  | Ce1 | N7  | -66.5(3)  |
| C1  | C6  | Ce1 | N7  | 157.4(2)  | C5  | C6  | Ce1 | N1  | -141.6(5) |
| N2  | C6  | Ce1 | N1  | 112.7(3)  | C1  | C6  | Ce1 | N1  | -23.4(2)  |
| C5  | C6  | Ce1 | N3  | 116.6(4)  | N2  | C6  | Ce1 | N3  | 10.9(3)   |
| C1  | C6  | Ce1 | N3  | -125.2(2) | C5  | C6  | Ce1 | N4  | -177.1(4) |
| N2  | C6  | Ce1 | N4  | 77.2(3)   | C1  | C6  | Ce1 | N4  | -58.8(3)  |
| C5  | C6  | Ce1 | C1  | -118.2(5) | N2  | C6  | Ce1 | C1  | 136.1(4)  |
| C5  | C6  | Ce1 | C34 | 47.6(4)   | N2  | C6  | Ce1 | C34 | -58.1(3)  |
| C1  | C6  | Ce1 | C34 | 165.9(2)  | C5  | C6  | Ce1 | C23 | -87.5(4)  |
| N2  | C6  | Ce1 | C23 | 166.8(2)  | C1  | C6  | Ce1 | C23 | 30.7(3)   |
| C2  | C1  | Ce1 | N2  | 141.4(5)  | N1  | C1  | Ce1 | N2  | -113.5(3) |
| C6  | C1  | Ce1 | N2  | 24.6(2)   | C2  | C1  | Ce1 | N8  | -39.5(5)  |
| N1  | C1  | Ce1 | N8  | 65.5(3)   | C6  | C1  | Ce1 | N8  | -156.4(2) |
| C2  | C1  | Ce1 | N6  | 66.1(5)   | N1  | C1  | Ce1 | N6  | 171.2(3)  |
| C6  | C1  | Ce1 | N6  | -50.7(3)  | C2  | C1  | Ce1 | N5  | -3.6(4)   |
| N1  | C1  | Ce1 | N5  | 101.4(3)  | C6  | C1  | Ce1 | N5  | -120.4(3) |
| C2  | C1  | Ce1 | N7  | 77.5(5)   | N1  | C1  | Ce1 | N7  | -177.4(2) |
| C6  | C1  | Ce1 | N7  | -39.3(4)  | C2  | C1  | Ce1 | N1  | -105.0(5) |
| C6  | C1  | Ce1 | N1  | 138.1(4)  | C2  | C1  | Ce1 | N3  | 178.0(4)  |
| N1  | C1  | Ce1 | N3  | -76.9(3)  | C6  | C1  | Ce1 | N3  | 61.2(3)   |
| C2  | C1  | Ce1 | N4  | -115.8(5) | N1  | C1  | Ce1 | N4  | -10.8(3)  |
| C6  | C1  | Ce1 | N4  | 127.3(2)  | C2  | C1  | Ce1 | C6  | 116.8(6)  |
| N1  | C1  | Ce1 | C6  | -138.1(4) | C2  | C1  | Ce1 | C34 | 99.4(5)   |
| N1  | C1  | Ce1 | C34 | -155.6(2) | C6  | C1  | Ce1 | C34 | -17.5(3)  |
| C2  | C1  | Ce1 | C23 | -31.8(4)  | N1  | C1  | Ce1 | C23 | 73.3(2)   |
| C6  | C1  | Ce1 | C23 | -148.6(3) | C35 | C34 | Ce1 | N2  | 65.1(5)   |
| C39 | C34 | Ce1 | N2  | -52.1(3)  | N7  | C34 | Ce1 | N2  | 171.2(3)  |
| C35 | C34 | Ce1 | N8  | -116.1(5) | C39 | C34 | Ce1 | N8  | 126.6(3)  |
| N7  | C34 | Ce1 | N8  | -10.1(3)  | C35 | C34 | Ce1 | N6  | 141.6(6)  |
| C39 | C34 | Ce1 | N6  | 24.4(2)   | N7  | C34 | Ce1 | N6  | -112.4(3) |
| C35 | C34 | Ce1 | N5  | 177.4(5)  | C39 | C34 | Ce1 | N5  | 60.2(3)   |
| N7  | C34 | Ce1 | N5  | -76.6(3)  | C35 | C34 | Ce1 | N7  | -106.1(6) |
| C39 | C34 | Ce1 | N7  | 136.7(4)  | C35 | C34 | Ce1 | N1  | 73.8(6)   |
| C39 | C34 | Ce1 | N1  | -43.4(4)  | N7  | C34 | Ce1 | N1  | 179.9(2)  |
| C35 | C34 | Ce1 | N3  | -5.7(5)   | C39 | C34 | Ce1 | N3  | -122.9(3) |
| N7  | C34 | Ce1 | N3  | 100.3(3)  | C35 | C34 | Ce1 | N4  | -39.1(6)  |
| C39 | C34 | Ce1 | N4  | -156.3(2) | N7  | C34 | Ce1 | N4  | 66.9(3)   |
| C35 | C34 | Ce1 | C6  | 88.5(5)   | C39 | C34 | Ce1 | C6  | -28.7(3)  |
| N7  | C34 | Ce1 | C6  | -165.5(2) | C35 | C34 | Ce1 | C1  | 96.5(5)   |
| C39 | C34 | Ce1 | C1  | -20.7(3)  | N7  | C34 | Ce1 | C1  | -157.4(2) |
| C35 | C34 | Ce1 | C23 | -159.5(5) | C39 | C34 | Ce1 | C23 | 83.3(3)   |
| N7  | C34 | Ce1 | C23 | -53.5(3)  | C24 | C23 | Ce1 | N2  | -36.1(5)  |
| N5  | C23 | Ce1 | N2  | 67.9(3)   | C28 | C23 | Ce1 | N2  | -154.0(2) |
| C24 | C23 | Ce1 | N8  | 142.2(5)  | N5  | C23 | Ce1 | N8  | -113.7(3) |
| C28 | C23 | Ce1 | N8  | 24.4(2)   | C24 | C23 | Ce1 | N6  | -114.5(5) |
| N5  | C23 | Ce1 | N6  | -10.4(3)  | C28 | C23 | Ce1 | N6  | 127.7(3)  |
| C24 | C23 | Ce1 | N5  | -104.0(6) | C28 | C23 | Ce1 | N5  | 138.1(4)  |
| C24 | C23 | Ce1 | N7  | 179.8(5)  | N5  | C23 | Ce1 | N7  | -76.1(3)  |
| C28 | C23 | Ce1 | N7  | 62.0(3)   | C24 | C23 | Ce1 | N1  | -1.4(5)   |
| N5  | C23 | Ce1 | N1  | 102.7(3)  | C28 | C23 | Ce1 | N1  | -119.2(3) |
| C24 | C23 | Ce1 | N3  | 80.5(6)   | N5  | C23 | Ce1 | N3  | -175.4(2) |
| C28 | C23 | Ce1 | N3  | -37.3(4)  | C24 | C23 | Ce1 | N4  | 68.8(5)   |

|     |     |     |     |           |     |     |     |     |           |
|-----|-----|-----|-----|-----------|-----|-----|-----|-----|-----------|
| N5  | C23 | Ce1 | N4  | 172.8(3)  | C28 | C23 | Ce1 | N4  | -49.1(3)  |
| C24 | C23 | Ce1 | C6  | -43.7(5)  | N5  | C23 | Ce1 | C6  | 60.3(3)   |
| C28 | C23 | Ce1 | C6  | -161.5(3) | C24 | C23 | Ce1 | C1  | -29.6(5)  |
| N5  | C23 | Ce1 | C1  | 74.4(3)   | C28 | C23 | Ce1 | C1  | -147.5(3) |
| C24 | C23 | Ce1 | C34 | -156.3(5) | N5  | C23 | Ce1 | C34 | -52.3(3)  |
| C28 | C23 | Ce1 | C34 | 85.9(3)   |     |     |     |     |           |

Symmetry Operators:

x, y, z            -x, -y, -z

Table 5. Least-squares planes (x,y,z in crystal coordinates) and deviations from them  
(\* indicates atom used to define plane)

$$- 2.1161 (0.0143) x + 0.0471 (0.0148) y + 15.5615 (0.0069) z = 1.2282 (0.0068)$$

- \* -0.0072 (0.0017) N1
- \* 0.0072 (0.0017) N2
- \* -0.0072 (0.0017) N3
- \* 0.0072 (0.0017) N4
- 1.5067 (0.0018) Ce1

Rms deviation of fitted atoms = 0.0072

$$- 2.2540 (0.0150) x + 0.2707 (0.0160) y + 15.4513 (0.0080) z = 4.2563 (0.0067)$$

Angle to previous plane (with approximate esd) = 1.17 ( 0.10 )

- \* 0.0122 (0.0019) N5
- \* -0.0122 (0.0019) N6
- \* 0.0121 (0.0019) N7
- \* -0.0121 (0.0018) N8
- 1.5093 (0.0019) Ce1

Rms deviation of fitted atoms = 0.0122

## 2. Ce(tmtaa)(tmtaaH)

### 2.1 Diagram

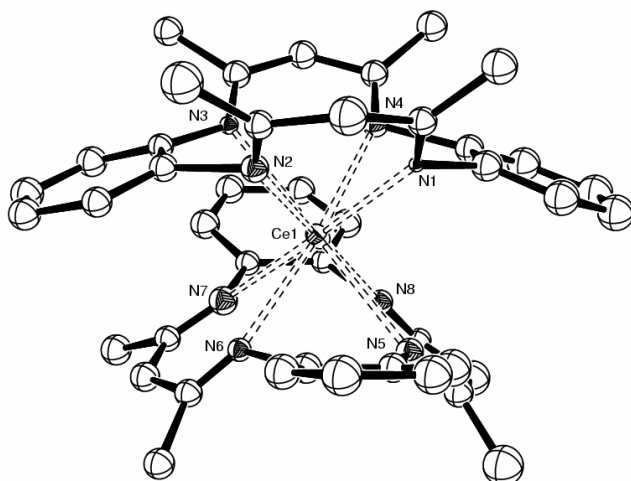

**Figure S2.** ORTEP diagram of Ce(tmtaa)(tmtaaH). Non-hydrogen atoms are refined isotropically, except cerium (Ce1).

### 2.2 Experimental Details

#### Data Collection

A fragment of a red block-like crystal of  $C_{44}H_{45}CeN_8$  having approximate dimensions of 0.19 x 0.14 x 0.02 mm was mounted on a glass fiber using Paratone N hydrocarbon oil. All measurements were made on a Bruker SMART CCD<sup>10</sup> CCD area detector with graphite monochromated MoK $\alpha$  radiation.

Cell constants and an orientation matrix, obtained from a least-squares refinement using the measured positions of 2465 centered reflections with  $I > 10\sigma(I)$  in the range  $2.5 < \theta < 24.2^\circ$  corresponded to a primitive triclinic cell with dimensions:

$$\begin{array}{ll} a = 8.919(1) \text{ \AA} & \alpha = 117.853(1)^\circ \\ b = 11.424(1) \text{ \AA} & \beta = 102.987(1)^\circ \\ c = 11.472(1) \text{ \AA} & \gamma = 101.300(1)^\circ \\ V = 943.63(16) \text{ \AA}^3 & \end{array}$$

For  $Z = 1$  and F.W. = 826.00, the calculated density is  $1.454 \text{ g/cm}^3$ .

Analysis of the systematic absences allowed the space group to be uniquely determined to be:

P1

The data were collected at a temperature of 119(2) K. Frames corresponding to an arbitrary

hemisphere of data were collected using  $\omega$  scans of  $0.3^\circ$  counted for a total of 15 seconds per frame.

### Data Reduction

Data were integrated by the program SAINT<sup>11</sup> to a maximum  $\theta$  value of  $24.73^\circ$ . The data were corrected for Lorentz and polarization effects. Data were analyzed for agreement and possible absorption using XPREP<sup>12</sup>. An empirical absorption correction based on comparison of redundant and equivalent reflections was applied using SADABS<sup>13</sup>. ( $T_{\max} = 0.9754$ ,  $T_{\min} = 0.7972$ ). Of the 4812 reflections that were collected, 3489 were unique ( $R_{\text{int}} = 0.0385$ ); equivalent reflections were merged. No decay correction was applied.

### Structure Solution and Refinement

The structure was solved by direct methods<sup>1</sup> and expanded using Fourier techniques<sup>2</sup>. Cerium atoms were refined anisotropically, while the rest were refined isotropically. Methyl and methane hydrogen atoms were included in calculated positions using a riding model, but not refined. The amido hydrogen was neither located nor included in the refinement. The crystal was a racemic twin (twin percentage = 41.1 %), and the twin law (-1 0 0, 0 -1 0, 0 0 -1) was incorporated in the refinement. The final cycle of full-matrix least-squares refinement<sup>3</sup> was based on 3489 reflections (all data) and 227 variable parameters and converged (largest parameter shift was 0.000 times its esd) with conventional unweighted and weighted agreement factors of:

$$R_1 = \sum ||F_o| - |F_c|| / \sum |F_o| = 0.0675 \text{ for } 3391 \text{ data with } I > 2\sigma(I)$$

$$wR_2 = [(\sum w (|F_o|^2 - |F_c|^2)^2 / \sum w |F_o|^2)]^{1/2} = 0.1826$$

The standard deviation of an observation of unit weight<sup>4</sup> was 1.100. The weighting scheme was based on counting statistics and included a factor ( $q = 0.1394$ ) to downweight the intense reflections. The maximum and minimum peaks on the final difference Fourier map corresponded to  $1.841$  and  $-1.804 \text{ e}^-/\text{\AA}^3$ , respectively.

Neutral atom scattering factors were taken from Cromer and Waber<sup>5</sup>. Anomalous dispersion effects were included in  $F_{\text{calc}}$ <sup>6</sup>; the values for  $\Delta f'$  and  $\Delta f''$  were those of Creagh and McAuley<sup>7</sup>. The values for the mass attenuation coefficients are those of Creagh and Hubbel<sup>8</sup>. All calculations were performed using the SHELXTL<sup>9</sup> crystallographic software package of Bruker Analytical X-ray Systems Inc.

## EXPERIMENTAL DETAILS

### A. Crystal Data

|                      |                                                                                                                                                   |
|----------------------|---------------------------------------------------------------------------------------------------------------------------------------------------|
| Empirical Formula    | C <sub>44</sub> H <sub>45</sub> CeN <sub>8</sub>                                                                                                  |
| Formula Weight       | 826.00                                                                                                                                            |
| Crystal Color, Habit | red, block                                                                                                                                        |
| Crystal Dimensions   | 0.19 x 0.14 x 0.02 mm                                                                                                                             |
| Crystal System       | triclinic                                                                                                                                         |
| Lattice Type         | primitive                                                                                                                                         |
| Lattice Parameters   | a = 8.919(1) Å<br>b = 11.424(1) Å<br>c = 11.472(1) Å<br>α = 117.853(1) °<br>β = 102.987(1) °<br>γ = 101.300(1) °<br>V = 943.63(16) Å <sup>3</sup> |
| Space Group          | P1                                                                                                                                                |
| Z value              | 1                                                                                                                                                 |
| D <sub>calc</sub>    | 1.454 g/cm <sup>3</sup>                                                                                                                           |
| F <sub>000</sub>     | 423                                                                                                                                               |
| μ (MoK)              | 1.25 cm <sup>-1</sup>                                                                                                                             |

### B. Intensity Measurements

|                             |                                                                                              |
|-----------------------------|----------------------------------------------------------------------------------------------|
| Diffractometer              | Bruker SMART CCD                                                                             |
| Radiation                   | MoK(λ = 0.71073 Å)<br>graphite monochromated                                                 |
| Detector Position           | 60.00 mm                                                                                     |
| Exposure Time               | 15 seconds per frame.                                                                        |
| Scan Type                   | ω (0.3 degrees per frame)                                                                    |
| θ <sub>max</sub>            | 24.73°                                                                                       |
| No. of Reflections Measured | Total: 4812<br>Unique: 3489 (R <sub>int</sub> = 0.0385)                                      |
| Corrections                 | Lorentz-polarization<br>Absorption (T <sub>max</sub> = 0.9754,<br>T <sub>min</sub> = 0.7972) |

### C. Structure Solution and Refinement

|                                          |                                                                               |
|------------------------------------------|-------------------------------------------------------------------------------|
| Structure Solution                       | direct                                                                        |
| Refinement                               | Full-matrix least-squares                                                     |
| Function Minimized                       | $\sum w( F_o ^2 -  F_c ^2)^2$                                                 |
| Least Squares Weighting scheme           | $w = 1/[\sigma^2(F_o^2) + (qP)^2 + 0.000P]$<br>where $P = [F_o^2 + 2F_c^2]/3$ |
| q-factor                                 | 0.1394                                                                        |
| Anomalous Dispersion                     | All non-hydrogen atoms                                                        |
| No. Observations ( $I > 2.00\sigma(I)$ ) | 3391                                                                          |
| No. Variables                            | 227                                                                           |
| Reflection/Parameter Ratio               | 15                                                                            |
| Residuals: R; wR <sub>2</sub> ; Rall     | 0.0675; 0.1826; 0.0694                                                        |
| Goodness of Fit Indicator                | 1.100                                                                         |
| Max Shift/Error in Final Cycle           | 0.000                                                                         |
| Maximum peak in Final Diff. Map          | 1.841 e <sup>-</sup> /Å <sup>3</sup>                                          |
| Minimum peak in Final Diff. Map          | -1.804 e <sup>-</sup> /Å <sup>3</sup>                                         |



## 2.3 Tables

Table 1. Atomic coordinates and  $U_{\text{iso}}/U_{\text{eq}}$  and occupancy

| atom | x           | y           | z          | $U_{\text{eq}}$ | Occupancy |
|------|-------------|-------------|------------|-----------------|-----------|
| C1   | 0.2579(19)  | -0.0243(15) | 0.6698(16) | 0.022(3)        | 1         |
| C2   | 0.287(2)    | -0.1658(18) | 0.6035(19) | 0.032(4)        | 1         |
| C3   | 0.401(2)    | 0.0958(19)  | 0.781(2)   | 0.038(4)        | 1         |
| C4   | 0.4367(19)  | 0.2434(15)  | 0.8161(16) | 0.022(3)        | 1         |
| C5   | 0.620(3)    | 0.347(3)    | 0.895(3)   | 0.044(8)        | 1         |
| C6   | 0.3555(19)  | 0.4282(16)  | 0.8111(16) | 0.022(3)        | 1         |
| C7   | 0.4361(19)  | 0.5464(16)  | 0.9427(17) | 0.025(3)        | 1         |
| C8   | 0.450(2)    | 0.6809(17)  | 0.9704(18) | 0.029(4)        | 1         |
| C9   | 0.370(2)    | 0.6905(18)  | 0.8585(18) | 0.032(4)        | 1         |
| C10  | 0.285(2)    | 0.5727(17)  | 0.7237(18) | 0.028(4)        | 1         |
| C11  | 0.2763(18)  | 0.4371(15)  | 0.6945(16) | 0.020(3)        | 1         |
| C12  | 0.158(2)    | 0.2806(16)  | 0.4392(17) | 0.025(3)        | 1         |
| C13  | 0.253(2)    | 0.3922(16)  | 0.4170(17) | 0.028(4)        | 1         |
| C14  | 0.065(2)    | 0.1503(16)  | 0.3193(17) | 0.027(3)        | 1         |
| C15  | -0.0125(19) | 0.0246(16)  | 0.3044(16) | 0.024(3)        | 1         |
| C16  | -0.068(2)   | -0.106(2)   | 0.1539(19) | 0.032(4)        | 1         |
| C17  | -0.105(2)   | -0.1141(16) | 0.4012(17) | 0.026(3)        | 1         |
| C18  | -0.255(2)   | -0.2139(18) | 0.307(2)   | 0.036(4)        | 1         |
| C19  | -0.328(2)   | -0.329(2)   | 0.314(2)   | 0.041(4)        | 1         |
| C20  | -0.248(2)   | -0.341(2)   | 0.428(2)   | 0.039(4)        | 1         |
| C21  | -0.094(2)   | -0.2412(19) | 0.5243(19) | 0.035(4)        | 1         |
| C22  | -0.021(2)   | -0.1280(17) | 0.5146(17) | 0.027(4)        | 1         |
| C23  | -0.039(2)   | 0.1129(16)  | 0.8842(16) | 0.024(3)        | 1         |
| C24  | -0.005(2)   | 0.0167(19)  | 0.9107(19) | 0.035(4)        | 1         |
| C25  | 0.128(2)    | 0.0542(19)  | 1.0242(19) | 0.036(4)        | 1         |
| C26  | 0.239(2)    | 0.1956(19)  | 1.109(2)   | 0.038(4)        | 1         |
| C27  | 0.208(2)    | 0.2917(18)  | 1.0791(18) | 0.031(4)        | 1         |
| C28  | 0.0719(19)  | 0.2571(16)  | 0.9690(17) | 0.025(3)        | 1         |
| C29  | 0.0498(19)  | 0.4754(16)  | 0.9986(16) | 0.022(3)        | 1         |
| C30  | 0.089(2)    | 0.5403(18)  | 1.1566(17) | 0.026(4)        | 1         |
| C31  | 0.017(2)    | 0.5578(17)  | 0.9428(17) | 0.026(3)        | 1         |
| C32  | -0.066(2)   | 0.5158(15)  | 0.8036(16) | 0.022(3)        | 1         |
| C33  | -0.117(2)   | 0.6301(18)  | 0.7856(18) | 0.032(4)        | 1         |
| C34  | -0.1815(19) | 0.3449(15)  | 0.5547(16) | 0.021(3)        | 1         |
| C35  | -0.152(2)   | 0.4163(18)  | 0.4889(18) | 0.031(4)        | 1         |
| C36  | -0.229(2)   | 0.3590(18)  | 0.3437(18) | 0.031(4)        | 1         |
| C37  | -0.342(2)   | 0.2173(17)  | 0.2584(18) | 0.030(4)        | 1         |
| C38  | -0.365(2)   | 0.1388(18)  | 0.3207(18) | 0.031(4)        | 1         |
| C39  | -0.2917(18) | 0.2004(15)  | 0.4654(15) | 0.020(3)        | 1         |
| C40  | -0.4376(18) | 0.0505(15)  | 0.5231(15) | 0.020(3)        | 1         |
| C41  | -0.603(3)   | 0.059(2)    | 0.451(2)   | 0.022(6)        | 1         |
| C42  | -0.449(2)   | -0.031(2)   | 0.592(2)   | 0.041(4)        | 1         |
| C43  | -0.318(2)   | 0.0053(16)  | 0.7200(17) | 0.025(3)        | 1         |
| C44  | -0.387(3)   | -0.042(2)   | 0.806(2)   | 0.049(5)        | 1         |
| N1   | 0.124(2)    | -0.0031(17) | 0.6322(18) | 0.006(4)        | 1         |
| N2   | 0.320(2)    | 0.2702(19)  | 0.794(2)   | 0.021(5)        | 1         |
| N3   | 0.181(2)    | 0.311(2)    | 0.572(2)   | 0.011(5)        | 1         |
| N4   | -0.022(2)   | 0.0450(18)  | 0.4088(18) | 0.021(4)        | 1         |
| N5   | -0.161(3)   | 0.077(2)    | 0.761(3)   | 0.022(6)        | 1         |
| N6   | 0.0486(19)  | 0.3705(16)  | 0.9163(16) | 0.016(4)        | 1         |

|     |           |            |           |          |   |
|-----|-----------|------------|-----------|----------|---|
| N7  | -0.093(3) | 0.399(2)   | 0.706(2)  | 0.027(6) | 1 |
| N8  | -0.304(2) | 0.1079(19) | 0.547(2)  | 0.020(4) | 1 |
| Ce1 | 0.0075(1) | 0.1942(1)  | 0.6641(1) | 0.019(1) | 1 |

$U_{eq}$  is defined as one third of the orthogonalized  $U_{ij}$  tensor

Table 2. Anisotropic Displacement Parameters

| atom | $U_{11}$ | $U_{22}$ | $U_{33}$ | $U_{12}$ | $U_{13}$ | $U_{23}$ |
|------|----------|----------|----------|----------|----------|----------|
| Ce1  | 0.023(1) | 0.017(1) | 0.016(1) | 0.008(1) | 0.007(1) | 0.008(1) |

The general temperature factor expression:

$$\exp(-2\pi^2(a^2U_{11}h^2 + b^2U_{22}k^2 + c^2U_{33}l^2 + 2a*b*U_{12}hk + 2a*c*U_{13}hl + 2b*c*U_{23}kl))$$

Table 3. Selected Bond Lengths(Å)

| atom | atom | distance  | atom | atom | distance  |
|------|------|-----------|------|------|-----------|
| N1   | Ce1  | 2.571(17) | N2   | Ce1  | 2.594(19) |
| N3   | Ce1  | 2.56(2)   | N4   | Ce1  | 2.524(17) |
| N5   | Ce1  | 2.57(2)   | N6   | Ce1  | 2.520(16) |
| N7   | Ce1  | 2.54(2)   | N8   | Ce1  | 2.555(19) |

### 3. References

(1) XS: Program for the Solution of X-ray Crystal Structures, Part of the SHELXTL Crystal Structure Determination Package, Bruker Analytical X-ray Systems Inc.: Madison, WI, (1995-99)

(2) XL: Program for the Refinement of X-ray Crystal Structures, Part of the SHELXTL Crystal Structure Determination Package, Bruker Analytical X-ray Systems Inc.: Madison, WI, (1995-99)

(3) Least-Squares:

$$\text{Function minimized: } \sum w (|F_o|^2 - |F_c|^2)^2$$

(4) Standard deviation of an observation of unit weight:

$$[\sum w (|F_o|^2 - |F_c|^2)^2 / (N_o - N_v)]^{1/2}$$

where:  $N_o$  = number of observations  
 $N_v$  = number of variables

(5) Cromer, D. T. & Waber, J. T.; "International Tables for X-ray Crystallography", Vol. IV, The Kynoch Press, Birmingham, England, Table 2.2 A (1974).

(6) Ibers, J. A. & Hamilton, W. C.; Acta Crystallogr., 17, 781 (1964).

(7) Creagh, D. C. & McAuley, W.J. ; "International Tables for Crystallography", Vol C, (A.J.C. Wilson, ed.), Kluwer Academic Publishers, Boston, Table 4.2.6.8, pages 219-222 (1992).

(8) Creagh, D. C. & Hubbell, J.H.; "International Tables for Crystallography", Vol C, (A.J.C. Wilson, ed.), Kluwer Academic Publishers, Boston, Table 4.2.4.3, pages 200-206 (1992).

(9) XP: Molecular Graphics program. Part of the SHELXTL Structure Determination Package. Bruker Analytical X-ray Systems Inc.: Madison, WI, (1995-99)

(10) SMART: Area-Detector Software Package, Bruker Analytical X-ray Systems, Inc.: Madison, WI, (1995-99)

(11) SAINT: SAX Area-Detector Integration Program, V5.04; Siemens Industrial Automation, Inc.: Madison, WI, (1995)

(12) XPREP: (v 5.03) Part of the SHELXTL Crystal Structure Determination Package, Siemens Industrial Automation, Inc.: Madison, WI, (1995)

(13) SADABS: Siemens Area Detector ABSorption correction program, George Sheldrick, (1996). Advance copy, private communication.
